# Supplementary material
Source: publisher figshare collection journal article supplement (https://acs.figshare.com/ndownloader/files/17188742)
Supplement: Supplementary file 1 [file 17188742]

# Supporting Information

## Photoresponsive Graphene Composite Bilayer Actuator for Soft Robots

*Xiaodong Wang<sup>1,2,3</sup>, Niandong Jiao<sup>1,3\*</sup>, Steve Tung<sup>1,3,4</sup>, Lianqing Liu<sup>1,3\*</sup>*

1. State Key Laboratory of Robotics, Shenyang Institute of Automation, Chinese

Academy of Sciences, Shenyang 110016, China

2. University of the Chinese Academy of Sciences, Beijing 100049, China

3. Institutes for Robotics and Intelligent Manufacturing, Chinese Academy of

Sciences, Shenyang 110016, China

4. Department of Mechanical Engineering, University of Arkansas, Arkansas 72701,

USA

\* Corresponding authors

E-mail: ndjiao@sia.cn, lqliu@sia.cn

**KEYWORDS.** Soft actuator, photoresponse, biomimetic, superhydrophobic, composite materials

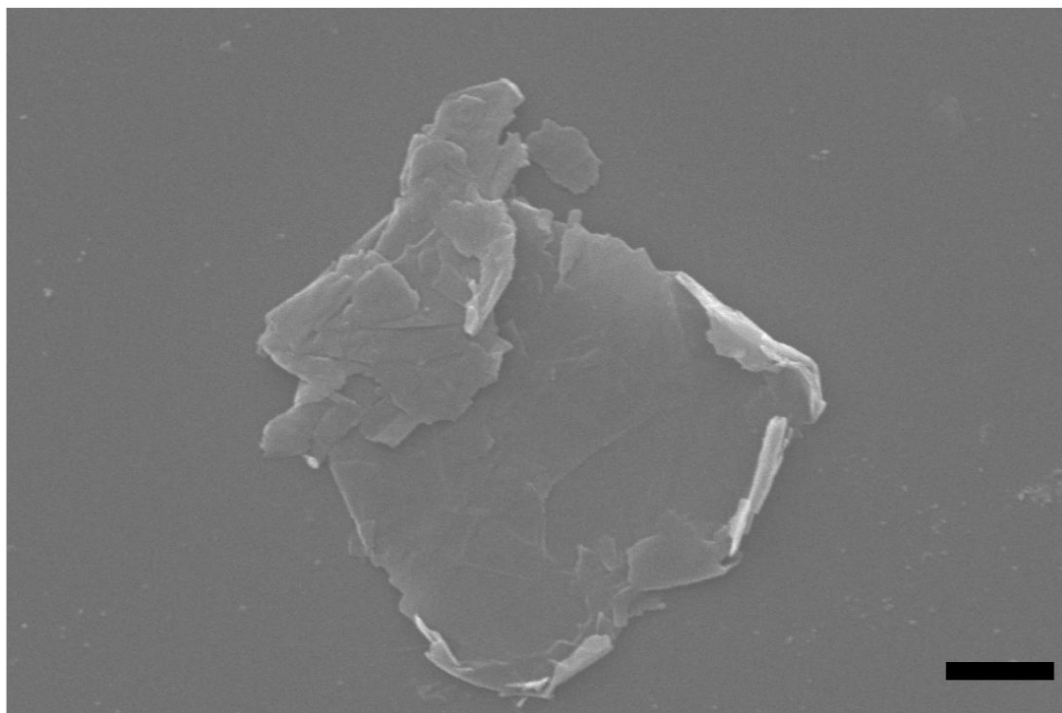

**Figure S1.** SEM image of graphene. The scale bar is 2  $\mu\text{m}$ .

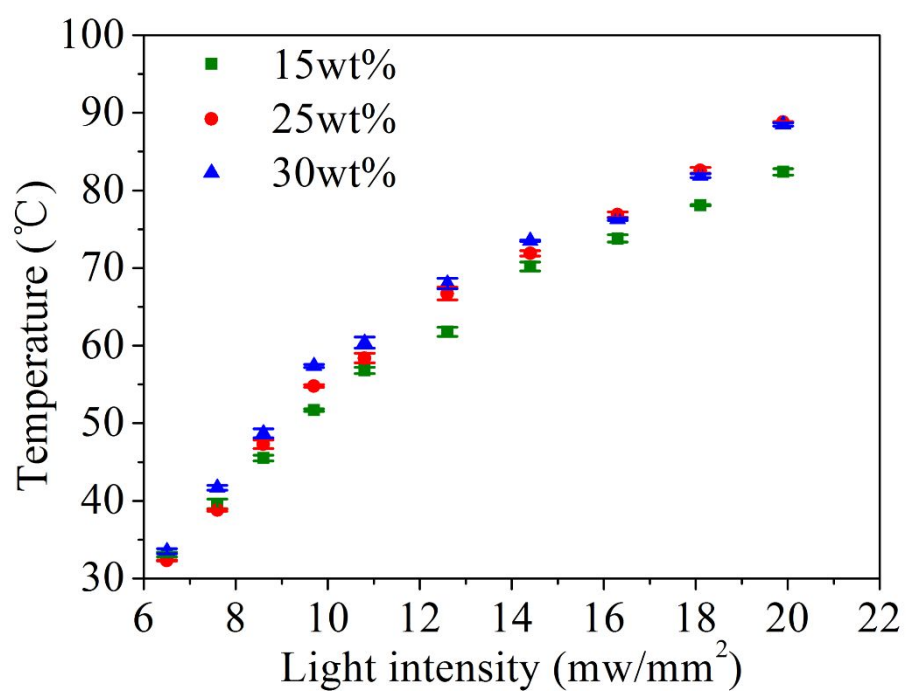

**Figure S2.** The maximum temperature of actuator varies with concentration and light intensity.
